1 **Emerging viruses are an underestimated cause of undiagnosed febrile illness in Uganda**

2

3 Authors

4 Shirin Ashraf\*<sup>1</sup>, Hanna Jerome\*<sup>1</sup>, Daniel Lule Bugembe<sup>3</sup>, Deogratius Ssemwanga<sup>2,3</sup>, Timothy  
5 Byaruhanga<sup>2</sup>, John Timothy Kayiwa<sup>2</sup>, Robert Downing<sup>2</sup>, Jesus F. Salazar-Gonzalez<sup>3</sup>, Maria G.  
6 Salazar<sup>3</sup>, James G. Shepherd<sup>1</sup>, Chris Davis<sup>1</sup>, Nicola Logan<sup>1</sup>, Vattipally B. Sreenu<sup>1</sup>, Gavin S. Wilkie<sup>1</sup>,  
7 Ana da Silva Filipe<sup>1</sup>, Alfred Ssekagiri<sup>1, 2</sup>, Prossy Namuwulya<sup>2</sup>, Henry Bukenya<sup>2</sup>, Brian K. Kigozi<sup>2</sup>,  
8 Weronika Witkowska McConnell<sup>1</sup>, Brian J. Willett<sup>1</sup>, Stephen Balinandi<sup>2</sup>, Julius Lutwama<sup>2</sup>,  
9 Pontiano Kaleebu<sup>2,3</sup>, Josephine Bwogi<sup>1,2</sup>, Emma C. Thomson<sup>1,4</sup>

10

11 \*Contributed equally

12  Contributed equally

13 Institutions

14 1 MRC-University of Glasgow Centre for Virus Research

15 2 Uganda Virus Research Institute

16 3 MRC/UVRI & LSHTM Uganda Research Unit

17 4 LSHTM

18

19

20 **SUMMARY**

21 **Background:** Viruses that cause acute febrile illness (AFI) in sub-Saharan Africa cause a spectrum  
22 of disease from mild to life-threatening. Viral infection is often undiagnosed, as routine  
23 diagnostics are insufficient to capture the diversity of circulating pathogens.

24

25 **Methods:** 1281 patients with fever of 2-7 days were prospectively recruited from three sites in  
26 Uganda as part of the CDC-UVRI AFI Study and screened with enhanced diagnostics. Plasma from  
27 233 undiagnosed patients was analysed using metagenomic next-generation sequencing (mNGS).  
28 Confirmatory testing was carried out by PCR and serology.

29

30 **Findings:** Thirty-eight viral pathogens were identified by mNGS in 35/233 (15%) undiagnosed  
31 patients including Measles, Hepatitis A/B/E viruses, Human immunodeficiency virus-1,  
32 Rhinovirus, Rotavirus-like virus, Human herpesvirus 6B, Human parainfluenza virus 3 and  
33 Enteroviruses. Four high-consequence arboviruses were found in six patients; Crimean-Congo  
34 haemorrhagic fever virus, Rift Valley fever virus, dengue virus and yellow fever virus. Le Dantec  
35 virus, last reported in 1969, was detected and confirmed by serology in one patient (and a  
36 contact of that patient). The majority of patients (23/30; 76%) diagnosed with an acute viral  
37 infection were treated with antibiotics and/or (12/30; 40%) antimalarials.

38

39 **Interpretation:** AFI in Uganda is commonly associated with undiagnosed viral infection, including  
40 high-consequence and rarely reported viruses. This highlights an ongoing risk to public health  
41 and the need for improved vigilance. MNGS alongside diagnostic serology is a powerful method  
42 for clinical surveillance to investigate circulating viral pathogens. Cost-effective diagnostic assays  
43 should be adapted according to regional needs for testing.

44

45 **Funding:** Medical Research Council and Wellcome Trust

46

47 **Keywords:** genomics, febrile illness, sub-Saharan Africa, haemorrhagic fever viruses

## 48 INTRODUCTION

49 East Africa is a biodiverse region and a hotspot for viral zoonoses. In the last decade, Uganda has  
50 reported outbreaks of haemorrhagic fever caused by Ebola (EBOV), Sudan (SUDV), Marburg  
51 (MARV), Rift Valley fever (RVFV), yellow fever (YFV) and Crimean-Congo haemorrhagic fever  
52 (CCHFV) viruses<sup>1</sup>. Many vector-borne viral infections are prevalent in Uganda, and several were  
53 described here for the first time, including Zika virus (ZIKV), Semliki Forest virus (SFV),  
54 chikungunya virus (CHIKV), O’Nyong Nyong virus (ONNV) and West Nile virus (WNV)<sup>2</sup>.  
55 Anthropogenic change, as a result of frequent travel, increasing commerce, and shifting global  
56 climate patterns raises the risk of spread within and outside zoonotic hotspots<sup>3</sup>. Many infections  
57 are likely missed due to the scarcity of diagnostic tests, increasing the risk of spread of high  
58 consequence viruses. Further, they may be misattributed to malaria or bacterial infection,  
59 increasing the risk of antimicrobial resistance. In this study, we investigated the occurrence of  
60 undiagnosed viral infections as a cause of acute febrile illness (AFI).

61

62 AFI is a common cause of presentation to healthcare centres (HC) across sub-Saharan Africa  
63 (SSA), despite a significant reduction in malaria prevalence following successful intervention  
64 campaigns<sup>4</sup>. Communicable diseases are estimated to account for up to 36% productivity losses  
65 in SSA<sup>5</sup>. The contribution of viral infection to AFI in Africa is at least 8-60%, likely an under-  
66 estimate as population studies have relied on traditional diagnostic tests which are limited to  
67 selected pathogens<sup>6-9</sup>. A thorough understanding of the burden of viral disease is essential for  
68 implementing prevention strategies by limiting vector-borne transmission, introducing  
69 vaccination where needed and available, rapid cost-effective diagnostics and treatments.  
70 Metagenomic next-generation sequencing (mNGS) allows for unbiased identification of viral  
71 genomes in clinical samples, including known and novel pathogens. In this study, we used mNGS  
72 to identify viral infections in patients in Uganda presenting with AFI that remained undiagnosed  
73 after routine serological and PCR-based assays.

## 74 **METHODS**

### 75 **Patients and sampling**

76 1281 patients were recruited prospectively with informed consent into the AFI study from three  
77 study sites in Uganda and assigned an anonymized study number, not known to anyone outside the  
78 recruitment team at each healthcare provision site; Ndejje HC IV (Wakiso), St. Paul's HC IV (Kasese),  
79 and Adumi HC IV (Arua) between April 2011 and January 2013 (**Figure 1a**). Inclusion criteria were >2  
80 years age with (a) a reported fever lasting 2-7 days or  $\geq 38^{\circ}\text{C}$  temperature on admission, or (b)  
81 symptoms consistent with brucellosis or typhoid fever. Cases with clinical evidence of an alternative  
82 diagnoses such as otitis media were excluded. Samples were obtained at presentation (acute sample)  
83 and 14-21 days later (convalescent sample). Diagnostic assays including serology, blood culture and  
84 blood films were carried out to identify and exclude active or recent infection with malaria, typhoid,  
85 leptospirosis, rickettsiae, CHIKV, dengue (DENV), WNV, YFV and ONNV. 210 patients remained  
86 undiagnosed and acute plasma were retrospectively tested using mNGS. In addition, 23 samples  
87 were obtained from two outbreaks of febrile illness that occurred within the time period of the  
88 study.

88

### 89 **Ethics statement**

90 Ethical approval for the AFI study was granted by the Uganda Virus Research Institute (UVRI)  
91 Research Ethics Committee (GC/127/10/02/19) and the Uganda National Council for Science and  
92 Technology (HS767).

93

### 94 **Sample processing and mNGS**

95 RNA was extracted from 200 $\mu\text{l}$  of plasma using the Agencourt RNAdvance Blood Kit (Beckman  
96 Coulter), according to manufacturer's instructions, including DNase treatment at  $37^{\circ}\text{C}$  for 15min.  
97 RNA was reverse transcribed using Superscript III (Invitrogen) followed by dsDNA synthesis with  
98 NEBNext Enzyme (New England Biolabs). DNA libraries were prepared using LTP low-input Library  
99 preparation kit (KAPA Biosystems) as previously described<sup>10</sup>. Resulting libraries were quantified  
100 with the Qubit 3.0 fluorometer (Invitrogen) and their size determined using a 4200 TapeStation  
101 (Agilent). Libraries were pooled in an equimolar ratio and sequenced on the Illumina MiSeq and  
102 NextSeq platforms.

103

### 104 **Bioinformatic analysis**

105 Raw Fastq files were searched directly for evidence of viral sequences using Diamond BLASTX  
106 **(Figure S1a)**<sup>11</sup>. *De novo* assembly was carried out using dipspades and contigs were identified  
107 using Diamond BLASTX against the nr database<sup>12</sup>. Viral hits detected with blastx were confirmed  
108 with blastn and mapped to the closest reference genome using *Tanoti*, a mapper developed for  
109 use with highly diverse viral genomes ([github.com/vbsreenu/Tanoti](https://github.com/vbsreenu/Tanoti)). A diagnosis threshold of 28  
110 nucleotides was estimated as a reliable cut-off following an analysis of all common human viral  
111 pathogens and removal of genomic repeat regions, well under the minimum sequence length in  
112 our samples **(Figure S1b)**. Maximum-likelihood phylogenetic analysis was carried out using  
113 IQTREE and 1000 ultra-fast bootstrap replicates using relevant reference sequences<sup>13</sup>.  
114 Uncorrected pairwise-distances were estimated using MEGA 10.0<sup>14</sup>.

115

### 116 **Capture ELISA**

117 Rhabdovirus (Le Dantec; LDV and Adumi virus) glycoprotein genes (synthesized by Eurofins  
118 Genomics) excluding the transmembrane regions (identified using TMHMM and TMPred) were  
119 amplified and cloned into the secretory mammalian expression vector pHLSec containing a C-  
120 terminal 6xHistidine tag<sup>15,16</sup>. Human embryonic kidney cells (HEK 293T) were maintained in  
121 Dulbecco's modified Eagle's medium (DMEM) supplemented with 100IU/ml penicillin, 100µg/ml  
122 streptomycin, 2mM glutamine and 10% foetal bovine serum. Cells were transfected (Fugene 6,  
123 Promega) and cell supernatant containing secreted recombinant glycoproteins was harvested at  
124 48-hours and expression confirmed by Western Blotting against 6xHis. ELISA plates (ImmulonHB)  
125 were coated with rabbit anti-His antibody overnight and blocked with 2.5% BSA/PBS at 37°C for 1  
126 hour. Cell supernatant containing glycoprotein was added to the wells followed by patient  
127 serum, both for 1 hour at 37°C. This was followed by HRP-conjugated goat anti-human IgG at  
128 room temperature for 1 hour. Wells were washed after each step with 0.1% Tween-20/PBS.  
129 Reactions were developed using TMB substrate, stopped with 0.16M sulphuric acid and read on  
130 a spectrophotometer (Pherastar).

131

### 132 **Pseudotype neutralization assay**

133 The use of Vesicular Stomatitis Virus (VSV) in which the glycoprotein sequence has been replaced  
134 (VSVΔG*luc*) to generate pseudotyped viruses has been described previously<sup>17</sup>. Glycoprotein  
135 genes were cloned into the eukaryotic expression vector and transfected into HEK-293T cells  
136 using polyethylenimine followed by infection with VSVΔG*luc*-VSV-G at a multiplicity of infection

137 of 0.02. Cells were incubated for one hour at 37°C, washed with PBS and re-incubated in DMEM.  
138 Supernatants were harvested 72-hours post infection. Pseudoparticle activity was assessed on  
139 HEK-293T cells by measuring luciferase activity at 72-hours on a Microbeta 1450 Jet luminometer  
140 (Perkin Elmer).  
141 For neutralisation assays,  $1 \times 10^4$  HEK-293T cells were plated in a white 96-well plate and  
142 incubated at 37°C for one hour. Four-fold serum dilutions were prepared in DMEM ranging from  
143 1:8 to 1:131072. Serum was mixed with either VSV $\Delta$ Gluc-VSV-G or VSV $\Delta$ Gluc-LDV-G at a  
144 concentration expected to generate a luciferase reading of  $1 \times 10^6$  counts per second and  
145 incubated for 1 hour at 37°C. 50 $\mu$ l per well of the pseudotype/serum mixture was added to the  
146 cells and incubated for 24 hours. Luciferase substrate was added to each well (Steadylite plus™,  
147 Perkin Elmer) and luminescence measured on a Chameleon V plate scintillation counter (Hidex  
148 Oy).

149 **RESULTS**

150 **Demographics and clinical analysis**

151 15% of patients with undiagnosed AFI (35/233) had evidence of acute viral infection by mNGS  
152 (**Figure 1b**). Demographic and clinical data was available for 30/35 patients with AFI. The median  
153 age at clinical presentation was 7.5 years (range 2-40). 80% of cases occurred in children under  
154 the age of 16. Males were more commonly represented than females (20/30; 67% versus 10/30;  
155 33%). The majority had been recently bitten by mosquitoes (22/30; 73%) and/or other  
156 arthropod vectors, including biting flies (3/30; 10%), ticks (3/30; 10%), fleas (2/30; 7%) and lice  
157 (1/30; 3%). Ten percent reported haemorrhagic symptoms but none of these had evidence of a  
158 viral haemorrhagic fever (VHF) virus by mNGS. At presentation, the median temperature was  
159 38.2°C. Other clinical symptoms are described in **Table 1**. Common presumptive diagnoses  
160 included malaria, respiratory tract infection, typhoid fever and unknown. The majority 23/30  
161 (77%) of patients were presumptively treated with antibiotics, 12 (40%) were treated with  
162 antimalarials and 5 (17%) with antihelminth therapy.

163 Of the 35 patients diagnosed by mNGS, 6 (17%) had a virus associated with VHF (CCHFV, RVFV,  
164 YFV and DENV), 9 (25%) with viruses associated with respiratory infection (human parainfluenza  
165 3, rhinovirus C and measles virus), 8 (22%) with hepatitis causing viruses (HAV, HBV, HEV), and 5  
166 (14%) with gastroenteritis associated viruses (**Table 2, Supplementary Table S1**). Six patients  
167 (17%) were infected with human immunodeficiency virus-1 (HIV-1). One patient was infected  
168 with the rhabdovirus LDV. Two of these cases, one each of yellow fever and RVF were correctly  
169 identified in the context of a known outbreak.

170

171 **Viruses associated with VHF**

172 Genomes from four VHF-associated viruses were detected in six febrile patients; CCHFV (patient  
173 138-2), RVFV (patients 117-3, RVF58), DENV (patient ARB248) and YFV (patients YFV685,  
174 ARB176).

175

176 The CCHF patient (138-2) was a male in his 30s from Kasese district. He presented with fever  
177 (37.9°C), headache, nausea and joint pain. He had been bitten by mosquitoes but had not been  
178 aware of tick bites and had not recently slaughtered animals. He was treated with vitamins and  
179 paracetamol and recovered. Partial (10-25% coverage) CCHFV sequences across all three  
180 segments; large (L), medium (M) and small (S) were detected by mNGS (**Figure 2a**). The L and S



181 segments had >90% nucleotide identity to previously identified genomes from Uganda and  
182 Democratic Republic of the Congo, respectively (**Table 2, S1**). The M segment had 81%  
183 nucleotide identity to a genome from Uganda, suggestive of higher divergence or possible  
184 reassortment (**Figure 2d**). Convalescent serology was not available from the patient, who  
185 recovered and had moved abroad.

186

187 Two cases of RVF (117-3, RVF58) were detected. RVF58 was suspected due to occupational risk  
188 (contact with slaughtered animals) and suggestive symptoms during an outbreak, and was  
189 confirmed by serology. 117-3 was a woman in her 30s from a rural part of Arua district who  
190 gave a 3-day history of fever but whose temperature was recorded as 36.3°C on admission. She  
191 described chills, headache, eye, neck and joint pain, nausea, diarrhoea and jaundice. She had  
192 been bitten by mosquitoes and fleas. She was given paracetamol and attended a traditional  
193 healer for further treatment. Convalescent serology was not available for this patient. Viral reads  
194 most closely matched the L segment of a Ugandan strain in case 1 (RVF58) and the M segment of  
195 a Kenyan strain in case 2 (117-3).

196

197 Two cases of YFV infection and one DENV infection (genotype 3) were detected during suspected  
198 YFV outbreaks and confirmed by convalescent serology. All genomes identified by mNGS were  
199 related to East/Central Africa lineages (**Table 2, S1; Figure 2 b,c,e,f**).

200

201 While haemorrhagic symptoms were recorded for 3/30 (10%) AFI study cohort patients, none of  
202 the these had a known VHF virus detected. The study patients described above with CCHFV and  
203 RVFV did not report classical haemorrhagic symptoms.

204

#### 205 **Le Dantec virus**

206 Patient 220-2 was a male aged between 5 and 10 years from Kasese district. He presented to hospital  
207 with a 38.5°C fever of 4 days, with headache, abdominal pain, vomiting and joint pains. He reported having  
208 been bitten by mosquitoes. He was treated with ciprofloxacin and paracetamol for suspected  
209 typhoid fever and made a full recovery. By mNGS, we detected the full genomic sequence of a  
210 previously rarely reported rhabdovirus; Le Dantec virus (LDV; **Figure 3a**). This was confirmed by  
211 direct RT-PCR from patient plasma and Sanger sequencing. The LDV genome had 94% nucleotide  
212 identity to the RefSeq LDV genome (NC\_034443.1), isolated for the first time in 1965 in Senegal

213 and sequenced from an archival sample in 2015<sup>18</sup> (**Figure 3d**). In keeping with an active infection,  
214 we demonstrated immunological response to LDV glycoprotein by ELISA and pseudotype  
215 neutralisation assay, in both the patient and in a contact of the patient who had been unwell at  
216 the same time, using convalescent serum (**Figure 3b,c**).

217

#### 218 **Viruses associated with acute hepatitis**

219 Hepatitis A (HAV) and hepatitis E (HEV) viruses were detected in 5 (patients ARB169, 218-1, 169-  
220 1, 184-2, 145-3) and 2 (patients 20-2, 60-1) patients respectively. Clinical data was available for  
221 four of the HAV cases. The age of infection ranged from 2 to 15 years. All were febrile at  
222 presentation. Three of four patients presented with vomiting, one had diarrhoea and one had  
223 jaundice. All HAV genomes were genotype IB and related to previously reported sequences from  
224 Uganda (**Figure 4a, S3e**). The HEV patients were aged between 0 and 5 years, and febrile at  
225 presentation. One had diarrhoea and vomiting and the other had undifferentiated fever.  
226 The two HEV isolates were genotype 1e and closely related to a Nigerian sequence (**Figure 4b, S3d**).

227

#### 228 **Viruses associated with gastroenteritis**

229 Gastrointestinal viruses were detected in plasma from 5 patients, including 4 enteroviruses (the  
230 echoviruses E3, E4 and E9 and Coxsackie B3 virus from patients 212-1, 316-3, 165-1, 195-1  
231 respectively) and a fragment of a highly divergent rotavirus H-like virus in one patient (96-1)  
232 (**Figure 4c, S3f**).

233

#### 234 **Viruses associated with respiratory infection**

235 Respiratory viruses were detected in plasma from 9 patients and included six cases of measles  
236 morbillivirus (patients 215-1, 217-1, 242-1, 223-1, 113-1, 203-1), two cases of human  
237 parainfluenza virus 3 (patients 88-1, 114-1) and one case of rhinovirus C (patient 40-2) (**Figure**  
238 **4c,d and S3b,c**). The measles virus sequences closely matched recently reported Ugandan B3  
239 genomes. The rhinovirus C clustered with subtypes RV-C12 and RV-C44.

240

#### 241 **Bloodborne viruses**

242 The bloodborne viruses HBV (patient 192-1) and HIV-1 (patients RVF58, ARB176, 143-2, 390-1,  
243 199-2, 214-1) may have occurred as acute or chronic infections, detected in a population with a  
244 high seroprevalence of both viruses. HBV was detected in a teenage patient (192-1)

245 presenting with headache, anorexia and abdominal pain. It was most closely related to a  
246 sequence from Rwanda. HIV was identified as a co-infection in two patients, one with RVFV  
247 (RVF58) and another with YFV (ARB176) (**Figure 4e, S3a**); suggesting chronic infection. Patient  
248 214-1 was infected with HIV-1 subtype A1, clustering with another Ugandan sequence. All other  
249 HIV-1 sequences were subtype D.

250

### 251 **Herpesviruses**

252 Three patient samples (082-2, 185-2 and 143-2) contained human herpesvirus-6B (HHV6B)  
253 genome, the cause of roseola infantum, related to strains from USA, Uganda and DRC. Seven  
254 patients (187-2, 189-2, ARB244, ARB265, ARB454, ARB688 and HEV2) had evidence of  
255 cytomegalovirus (HHV5) in the bloodstream; this may have been acute or chronic infection. No  
256 varicella zoster virus (VZV) infections were detected.

257

### 258 **Viruses detected that are not known to be associated with disease**

259 MNGS also detected viruses often found in human populations that have not been definitively  
260 associated with disease. These included the annelloviruses: Torque Teno virus (TTV), Torque  
261 Teno mini virus (TTMV), Torque Teno midi virus (TTMdV); and human pegiviruses (HPgV) (**Table**  
262 **S2**).

263 We also detected a second and novel rhabdovirus sequence in several AFI samples by *de novo*  
264 assembly (Adumi virus). This virus was likely to be a contaminant of blood collection tubes, as  
265 discussed in Supplementary Information.

266 **DISCUSSION**

267 In this prospective cohort study of AFI in Uganda, we used mNGS to identify viral causes of acute  
268 undiagnosed fever in 210/1281 (16.4%) patients who tested negative after extensive screening  
269 for well-characterised pathogens, and an additional 23 samples obtained from outbreaks during  
270 the same time period. The cohort was prospectively recruited from patients presenting to three  
271 HCs in rural and urban Uganda. We detected viral pathogens in 35/233 (15.5%) patients,  
272 including 6/233 (2.6%) associated with VHF. Lack of clinical diagnosis of such viruses means that  
273 appropriate public health measures may not be taken to prevent onward transmission and  
274 appropriate treatment may not be given. The most commonly detected viruses reflected acute  
275 gastrointestinal or respiratory infection. The detection of active blood-borne virus infection  
276 reflects a chronic burden of disease and a need to widen treatment in the Ugandan population.  
277 Importantly, acute viral infection was invariably misdiagnosed as bacterial or malaria and treated  
278 with antibiotics or antimalarials. This carries an associated risk of antimicrobial drug resistance.  
279 We also noted vaccine-preventable infections in children (HAV, HBV, measles, Rotavirus)  
280 indicating the need for a more comprehensive vaccination schedule.

281

282 AFI is widespread in SSA and in the absence of specialised point-of-care diagnostics; clinical  
283 symptoms associated with different viruses may be indistinguishable. Even high-consequence  
284 VHFs such as Lassa fever and Ebola virus disease present with haemorrhage in less than 20% of  
285 cases<sup>19,20</sup>. We identified CCHFV in a patient with undifferentiated fever who did not report  
286 contact with ticks or slaughtered animals, highlighting the limitations of current risk algorithms in  
287 identifying such patients in an endemic area. A high CCHFV seroprevalence has recently been  
288 reported in farming communities and domesticated animals in Uganda, suggesting that  
289 unrecognised infection may be common<sup>21</sup>.

290

291 We also detected the mosquito-borne infections RVFV, DENV and YFV; of which RVF can also be  
292 caused by contact with infected livestock. RVF is widespread across Africa and may cause a  
293 spectrum of illness from mild to severe. It is associated with haemorrhage and encephalitis in  
294 around 1% of human cases<sup>22</sup>. DENV is transmitted by *Aedes* mosquitoes and is endemic in Asia,  
295 South America and sub-Saharan Africa. It is relatively less well reported from the African  
296 continent, although studies suggest high seroprevalence<sup>23,24</sup>. Worldwide, there are an estimated  
297 100 million clinical cases per year, of which around 5% progress to dengue shock syndrome or

298 dengue haemorrhagic fever. We detected DENV-3 in this study, in keeping with previous reports  
299 of genotypes 1-3 on the African continent. YFV is endemic in Africa and South America and is  
300 transmitted by *Aedes* and *Haemagogus* mosquitoes. Severe disease with haemorrhage occurs in  
301 up to 12% of those infected<sup>25</sup>. An effective live vaccine exists for YFV and has recently been used  
302 to control outbreaks in Brazil and DRC. It is required for travellers to Uganda and other endemic  
303 regions, but the local unvaccinated population may remain vulnerable to infection.

304

305 We detected two rhabdoviruses in this study; LDV, a potential pathogen and Adumi virus, a likely  
306 contaminant. Rhabdoviruses are highly divergent and ubiquitous in host range, infecting plants,  
307 invertebrates and vertebrates. Human disease is well-described; rabies lyssavirus causes fatal  
308 neurological infection and Chandipura virus causes acute neurological disease. Other, less well  
309 described members have also been suggested as human pathogens, including Bas Congo virus  
310 that was associated with a single outbreak of haemorrhagic disease in the DRC. Additionally,  
311 studies have also identified rhabdoviruses in blood from healthy asymptomatic individuals<sup>26,27</sup>.  
312 LDV is an emerging pathogen and has only two historical documentations; in a child with  
313 hepatosplenomegaly and fever in Senegal in 1965 (sequenced in 2015) and in a middle-aged  
314 shipyard worker with fever and severe neurological symptoms in Wales in 1969, who had  
315 offloaded a ship inbound from Nigeria. LDV belongs to the genus *Ledantevirus* and closely related  
316 species have been found in rodents and bats. Neurological pathology has been described in  
317 rodents infected experimentally with the virus<sup>28</sup>. In our study, we demonstrated an immune  
318 response and the development of neutralising antibodies in the infected individual and a  
319 household contact who had similar symptoms at the time.

320

321 Vaccine-preventable diseases remain common in Uganda, even for viruses covered under routine  
322 immunisation, indicating insufficient coverage to generate herd immunity. Uganda has an active  
323 Expanded Programme of Immunization (EPI) against measles, HBV and rotavirus. YFV vaccination  
324 was introduced in October 2022. Vaccine coverage is lower in some neighbouring countries and  
325 this may increase the risk of imported infection. Measles vaccine in Uganda is often given as a  
326 single dose and booster vaccines during outbreaks. Such an approach may limit severe illness but  
327 has lower efficacy than the two-dose regimen used in other countries<sup>29</sup>.

328

329 We detected a viral pathogen in 15.5% of undiagnosed cases, however, the high detection of  
330 viruses associated with respiratory and gastrointestinal infection in plasma highlights the high  
331 burden that these diseases carry in Uganda. The inclusion of respiratory and stool samples (not  
332 available in this study) in future studies will likely reveal a much higher prevalence of infection.  
333 Additionally, the inclusion of serological assays would increase detection of infections outside  
334 the viraemic phase. We have likely under-estimated the burden of viral disease in this study for  
335 these reasons.

336

337 Viral metagenomics, although a powerful and sensitive method for unbiased genomic discovery  
338 is prone to limitations. Caution must be practiced when interpreting NGS data to exclude  
339 artefacts, which can arise from cross-contamination from the environment, within sequencing  
340 reagents and from other samples processed or sequenced together. In several studies, viral reads  
341 have subsequently been related to contamination within kits or from the environment. For  
342 example, Nextera XT reagents have been associated with detection of Merkel cell  
343 polyomavirus<sup>30</sup>. In this study, we found a novel rhabdovirus in several patient samples, most  
344 likely as a result of contaminated blood tubes with a virus of mosquito origin. This highlights the  
345 need for careful interpretation of mNGS data, confirmation by other methods and the  
346 development of standards and validation methods to interpret experimental information.

347

## 348 **CONCLUSIONS**

349 Febrile illness is widespread in Uganda and a significant proportion of undiagnosed disease can  
350 be attributed to viral infections, several of which have pandemic potential and can cause high  
351 mortality and morbidity. Metagenomic next generation sequencing is a powerful tool to  
352 investigate the viral aetiology of AFI in high-risk populations and can be applied to develop low-  
353 cost clinical diagnostics. The finding of multiple highly pathogenic and poorly-described viruses in  
354 a single multi-site study in Uganda highlights the depth of the unknown with regard to circulating  
355 human viruses and the risk for onward transmission in a rapidly changing world.

356 **References :**

- 357 1. Carrington LB, Wills B. Lessons from history: viral surveillance in 1940s East Africa: Epidemiological  
358 notes on some viruses isolated in Uganda, GWA Dick, Transactions of the Royal Society of Tropical  
359 Medicine and Hygiene, 1953; 47 (1): 13–48. Trans R Soc Trop Med Hyg. 2018;112:413–4.
- 360 2. Mayanja MN, Mwiine FN, Lutwama JJ, Ssekagiri A, Egesa M, Thomson EC, et al. Mosquito-borne  
361 arboviruses in Uganda: History, transmission and burden. Journal of General Virology [Internet].  
362 2021 [cited 2023 Jan 17];102:001680. Available from:  
363 <https://www.microbiologyresearch.org/content/journal/jgv/10.1099/jgv.0.001680>
- 364 3. Mordecai EA, Ryan SJ, Caldwell JM, Shah MM, LaBeaud AD. Climate change could shift disease  
365 burden from malaria to arboviruses in Africa. Lancet Planet Health. 2020;4:e416–23.
- 366 4. Stoler J, Awandare GA. Febrile illness diagnostics and the malaria-industrial complex: a socio-  
367 environmental perspective. BMC Infect Dis. 2016;16:1–9.
- 368 5. Murray CJL, Vos T, Lozano R, Naghavi M, Flaxman AD, Michaud C, et al. Disability-adjusted life  
369 years (DALYs) for 291 diseases and injuries in 21 regions, 1990–2010: a systematic analysis for the  
370 Global Burden of Disease Study 2010. The lancet. 2012;380:2197–223.
- 371 6. Prasad N, Murdoch DR, Reyburn H, Crump JA. Etiology of severe febrile illness in low-and middle-  
372 income countries: a systematic review. PLoS One. 2015;10:e0127962.
- 373 7. Crump JA, Morrissey AB, Nicholson WL, Massung RF, Stoddard RA, Galloway RL, et al. Etiology of  
374 severe non-malaria febrile illness in Northern Tanzania: a prospective cohort study. PLoS Negl Trop  
375 Dis. 2013;7:e2324.
- 376 8. Maze MJ, Bassat Q, Feasey NA, Mandomando I, Musicha P, Crump JA. The epidemiology of febrile  
377 illness in sub-Saharan Africa: implications for diagnosis and management. Clinical Microbiology and  
378 Infection. 2018;24:808–14.
- 379 9. Baba M, Logue CH, Oderinde B, Abdulmaleek H, Williams J, Lewis J, et al. Evidence of arbovirus co-  
380 infection in suspected febrile malaria and typhoid patients in Nigeria. The Journal of Infection in  
381 Developing Countries. 2013;7:51–9.
- 382 10. Jerome H, Taylor C, Sreenu VB, Klymenko T, Filipe ADS, Jackson C, et al. Metagenomic next-  
383 generation sequencing aids the diagnosis of viral infections in febrile returning travellers. Journal  
384 of Infection. 2019;79:383–8.
- 385 11. Buchfink B, Xie C, Huson DH. Fast and sensitive protein alignment using DIAMOND. Nat Methods.  
386 2015;12:59–60.
- 387 12. Safonova Y, Bankevich A, Pevzner PA. dipSPAdes: assembler for highly polymorphic diploid  
388 genomes. Journal of Computational Biology. 2015;22:528–45.
- 389 13. Nguyen LT, Schmidt HA, von Haeseler A, Minh BQ. IQ-TREE: A Fast and Effective Stochastic  
390 Algorithm for Estimating Maximum-Likelihood Phylogenies. Mol Biol Evol [Internet]. 2015 [cited  
391 2022 Aug 8];32:268–74. Available from:  
392 <https://academic.oup.com/mbe/article/32/1/268/2925592>
- 393 14. Kumar S, Tamura K, Nei M. MEGA: molecular evolutionary genetics analysis software for  
394 microcomputers. Bioinformatics. 1994;10:189–91.
- 395 15. Aricescu AR, Lu W, Jones EY. A time-and cost-efficient system for high-level protein production in  
396 mammalian cells. Acta Crystallogr D Biol Crystallogr. 2006;62:1243–50.

- 397 16. Hofmann K, Stoffel W. TMpred, Prediction of Transmembrane Regions and Orientation. 1993.
- 398 17. Whitt MA. Generation of VSV pseudotypes using recombinant  $\Delta$ G-VSV for studies on virus entry,  
399 identification of entry inhibitors, and immune responses to vaccines. *J Virol Methods*.  
400 2010;169:365–74.
- 401 18. Walker PJ, Firth C, Widen SG, Blasdel KR, Guzman H, Wood TG, et al. Evolution of genome size and  
402 complexity in the Rhabdoviridae. *PLoS Pathog*. 2015;11:e1004664.
- 403 19. Schieffelin JS, Shaffer JG, Goba A, Gbakie M, Gire SK, Colubri A, et al. Clinical illness and outcomes  
404 in patients with Ebola in Sierra Leone. *New England journal of medicine*. 2014;371:2092–100.
- 405 20. (CDC C for DC and P. Imported Lassa fever--New Jersey, 2004. *MMWR Morb Mortal Wkly Rep*.  
406 2004;53:894–7.
- 407 21. Atim SA, Ashraf S, Belij-Rammerstorfer S, Ademun AR, Vudriko P, Nakayiki T, et al. Risk factors for  
408 Crimean-Congo Haemorrhagic Fever (CCHF) virus exposure in farming communities in Uganda.  
409 *Journal of Infection*. 2022;85:693–701.
- 410 22. Paweska JT. Rift Valley fever. In: *Emerging Infectious Diseases*. Elsevier; 2014. p. 73–93.
- 411 23. Simo FBN, Bigna JJ, Kenmoe S, Ndangang MS, Temfack E, Moundipa PF, et al. Dengue virus  
412 infection in people residing in Africa: a systematic review and meta-analysis of prevalence studies.  
413 *Sci Rep*. 2019;9:1–9.
- 414 24. Dieng I, Ndione MHD, Fall C, Diagne MM, Diop M, Gaye A, et al. Multifoci and multiseroypes  
415 circulation of dengue virus in Senegal between 2017 and 2018. *BMC Infect Dis*. 2021;21:1–11.
- 416 25. Johansson MA, Vasconcelos PFC, Staples JE. The whole iceberg: estimating the incidence of yellow  
417 fever virus infection from the number of severe cases. *Trans R Soc Trop Med Hyg [Internet]*. 2014  
418 [cited 2023 Jan 23];108:482–7. Available from:  
419 <https://academic.oup.com/trstmh/article/108/8/482/2765182>
- 420 26. Stremlau MH, Andersen KG, Folarin OA, Grove JN, Odi A, Ehiane PE, et al. Discovery of novel  
421 rhabdoviruses in the blood of healthy individuals from West Africa. *PLoS Negl Trop Dis*.  
422 2015;9:e0003631.
- 423 27. Grard G, Fair J, Chiu C, Leroy E. Bas-Congo virus: A novel rhabdovirus associated with acute  
424 hemorrhagic fever. In: *Emerging infectious diseases*. Elsevier; 2014. p. 13–24.
- 425 28. Woodruff AW, Ansdell VE, Bowen ET. Le Dantec virus infection in a patient who had not been to  
426 West Africa. *Br Med J*. 1977;2:1632.
- 427 29. Wichmann O, Hellenbrand W, Sagebiel D, Santibanez S, Ahlemeyer G, Vogt G, et al. Large measles  
428 outbreak at a German public school, 2006. *Pediatric Infectious Disease Journal [Internet]*. 2007  
429 [cited 2023 Jan 17];26:782–6. Available from:  
430 [https://journals.lww.com/pidj/Fulltext/2007/09000/Large\\_Measles\\_Outbreak\\_at\\_a\\_German\\_Public\\_School,.3.aspx](https://journals.lww.com/pidj/Fulltext/2007/09000/Large_Measles_Outbreak_at_a_German_Public_School,.3.aspx)  
431
- 432 30. Asplund M, Kjartansdóttir KR, Mollerup S, Vinner L, Fridholm H, Herrera JAR, et al. Contaminating  
433 viral sequences in high-throughput sequencing viromics: a linkage study of 700 sequencing  
434 libraries. *Clinical Microbiology and Infection*. 2019;25:1277–85.

435



1 **Emerging viruses are an underestimated cause of undiagnosed febrile illness in Uganda**

2

3 Authors

4 Shirin Ashraf\*<sup>1</sup>, Hanna Jerome\*<sup>1</sup>, Daniel Lule Bugembe<sup>3</sup>, Deogratius Ssemwanga<sup>2,3</sup>, Timothy  
5 Byaruhanga<sup>2</sup>, John Timothy Kayiwa<sup>2</sup>, Robert Downing<sup>2</sup>, Jesus F. Salazar-Gonzalez<sup>3</sup>, Maria G.  
6 Salazar<sup>3</sup>, James G. Shepherd<sup>1</sup>, Chris Davis<sup>1</sup>, Nicola Logan<sup>1</sup>, Vattipally B. Sreenu<sup>1</sup>, Gavin S. Wilkie<sup>1</sup>,  
7 Ana da Silva Filipe<sup>1</sup>, Alfred Ssekagiri<sup>1,2</sup>, Prossy Namuwulya<sup>2</sup>, Henry Bukenya<sup>2</sup>, Brian Kigozi<sup>2</sup>,  
8 Weronika Witkowska McConnell<sup>1</sup>, Brian J. Willett<sup>1</sup>, Stephen Balinandi<sup>2</sup>, Julius Lutwama<sup>2</sup>,  
9 Pontiano Kaleebu<sup>2,3</sup>, Josephine Bwogi<sup>2</sup>, Emma C. Thomson<sup>1,4</sup>

10

11 \*Contributed equally

12  Contributed equally

13 Institutions

14 1 MRC-University of Glasgow Centre for Virus Research

15 2 Uganda Virus Research Institute

16 3 MRC/UVRI & LSHTM Uganda Research Unit

17 4 LSHTM

18

19

20 **Figure 1. Undiagnosed viruses identified in the AFI study.** (a) AFI study sites and locations.  
 21 Viruses identified from undiagnosed samples are listed by site. (b) Viruses detected by mNGS  
 22 grouped as zoonoses/arboviruses (green), hepatitis (yellow), blood-borne infections (red),  
 23 respiratory viruses (blue), gastrointestinal infections (brown), viruses associated with rash  
 24 (purple) and uncharacterized (grey). Icons show the number of patients infected with each virus.  
 25

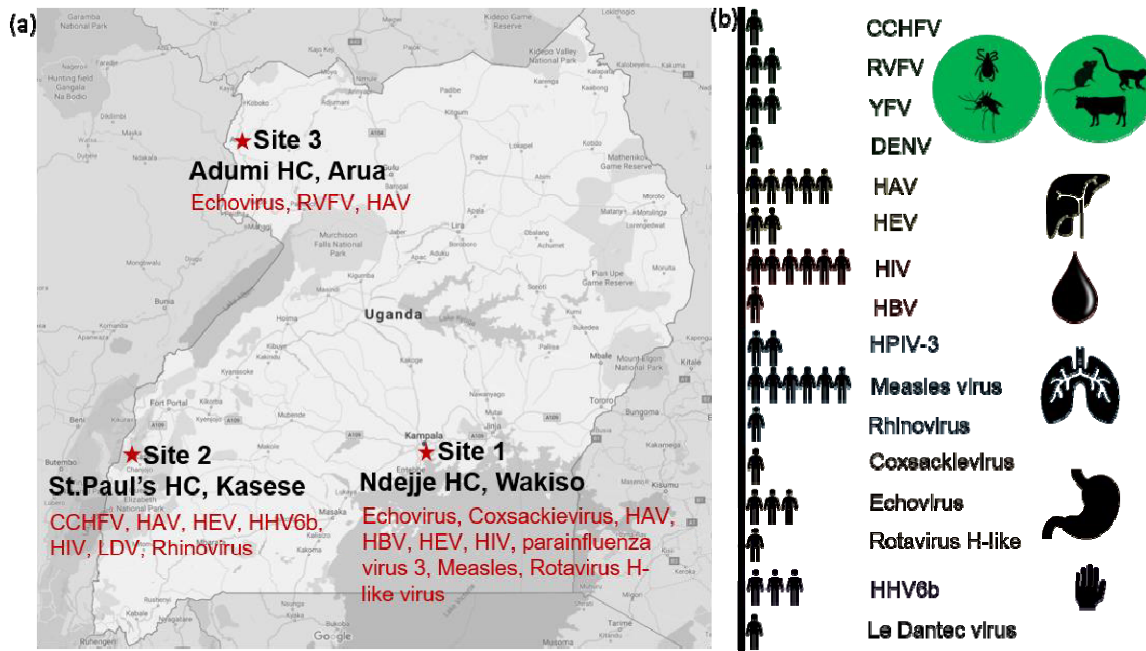

26 **Figure 2. Viruses associated with haemorrhagic fever.** (a-c) Coverage plots for CCHFV, YFV,  
 27 DENV identified by mNGS showing number of reads (y-axis) at each nucleotide position across  
 28 the genome (x-axis) for each virus. Reference orthonairovirus and flavivirus genomes indicate  
 29 regions covered by sequencing reads. (d) Phylogenetic tree of full-length nucleotide sequence of  
 30 CCHFV showing placement of patient isolate for L, M, S segments. Tip labels show strain name  
 31 and country of isolation. Colours indicate geographically distributed lineages of CCHFV. (e) Full  
 32 genome nucleotide tree of DENV genotype 3 sequences showing country and year of isolation. (f)  
 33 Full genome nucleotide tree of YFV sequences showing country and year of isolation.  
 34 Evolutionary scale is showing below for each tree. Ultrafast bootstrap values >90 are shown for  
 35 nodes. Patient samples are highlighted in grey. Substitution models used: GTR+F+I+G4 (CCHF-L,  
 36 DENV-3), GTR+F+R3 (CCHF-M), TIM2+F+I+G4 (CCHF-S), GTR+F+R2 (YFV).  
 37

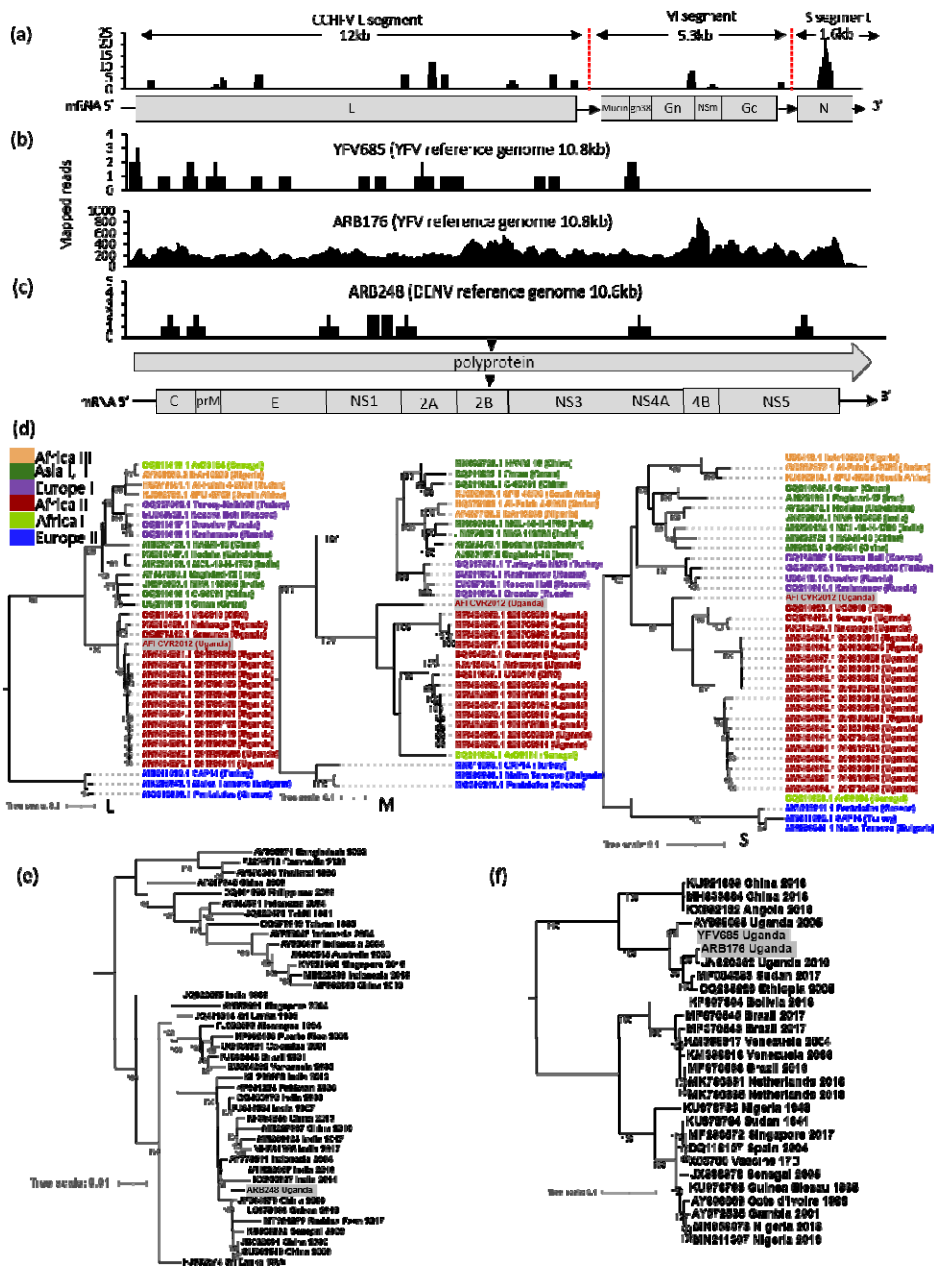

38 **Figure 3. Le Dantec virus (LDV).** (a) Coverage plots for LDV identified by mNGS showing number  
 39 of reads (y-axis) at each nucleotide position across the genome (x-axis) for each virus.  
 40 Sequencing depth for different genes across the genome is shown. (b) ELISA analysis showing IgG  
 41 antibody response to recombinant LDV glycoprotein in patient 220-2, contact of patient and a  
 42 healthy individual from Uganda. Plasmid containing an Ephrin B2 insert was used as a mock  
 43 recombinant protein. The plot shows absorbance OD values at 450nm (y-axis) against increasing  
 44 serum dilutions (x-axis). (c) Pseudotype neutralisation assay showing luciferase reporter activity  
 45 (y-axis) against increasing serum dilutions (x-axis) for patient 220-2, contact and healthy serum  
 46 using LeDantec pseudotype virus compared with VSV control. (d) Full genome maximum  
 47 likelihood phylogenetic nucleotide tree using the GTR+F+R4 model for ledantevirus sequences  
 48 illustrating the reported host for each virus. Evolutionary scale and ultrafast bootstrap values >90  
 49 are shown. The patient sample is highlighted in grey.

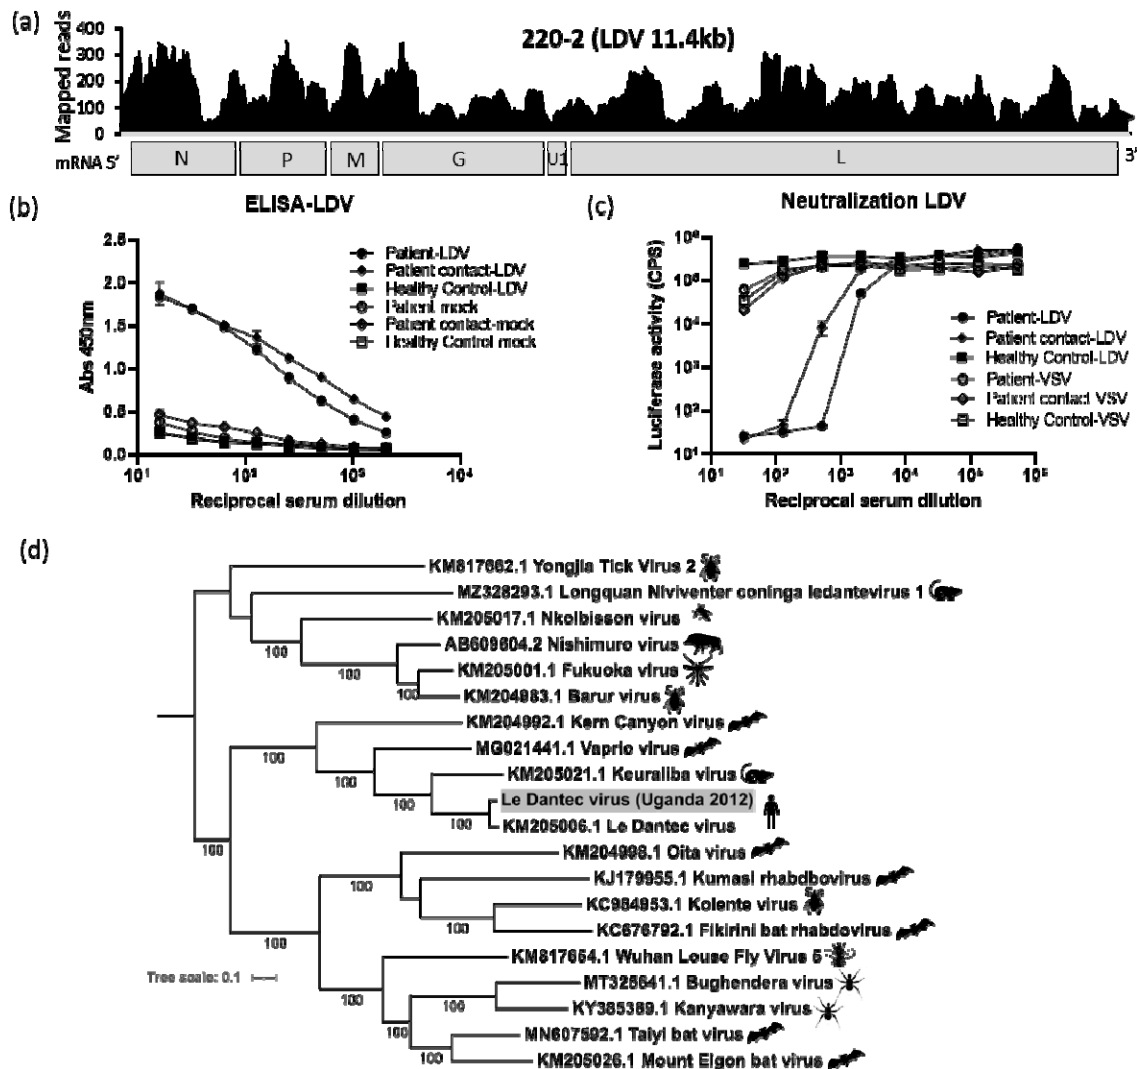

51

52

53 **Figure 4. Other viral pathogens identified from patient samples.** Coverage plots showing  
 54 number of mapped reads (y-axis) against genome position (x-axis) for each patient, for (a) HAV,  
 55 (b) HEV, (c) Enteroviruses including Echoviruses E3, E9/25, E4 and Rhinovirus C, (d) Measles virus;  
 56 and (e) HIV-1. Reference genome drawings indicate depth for different regions along the  
 57 sequence.

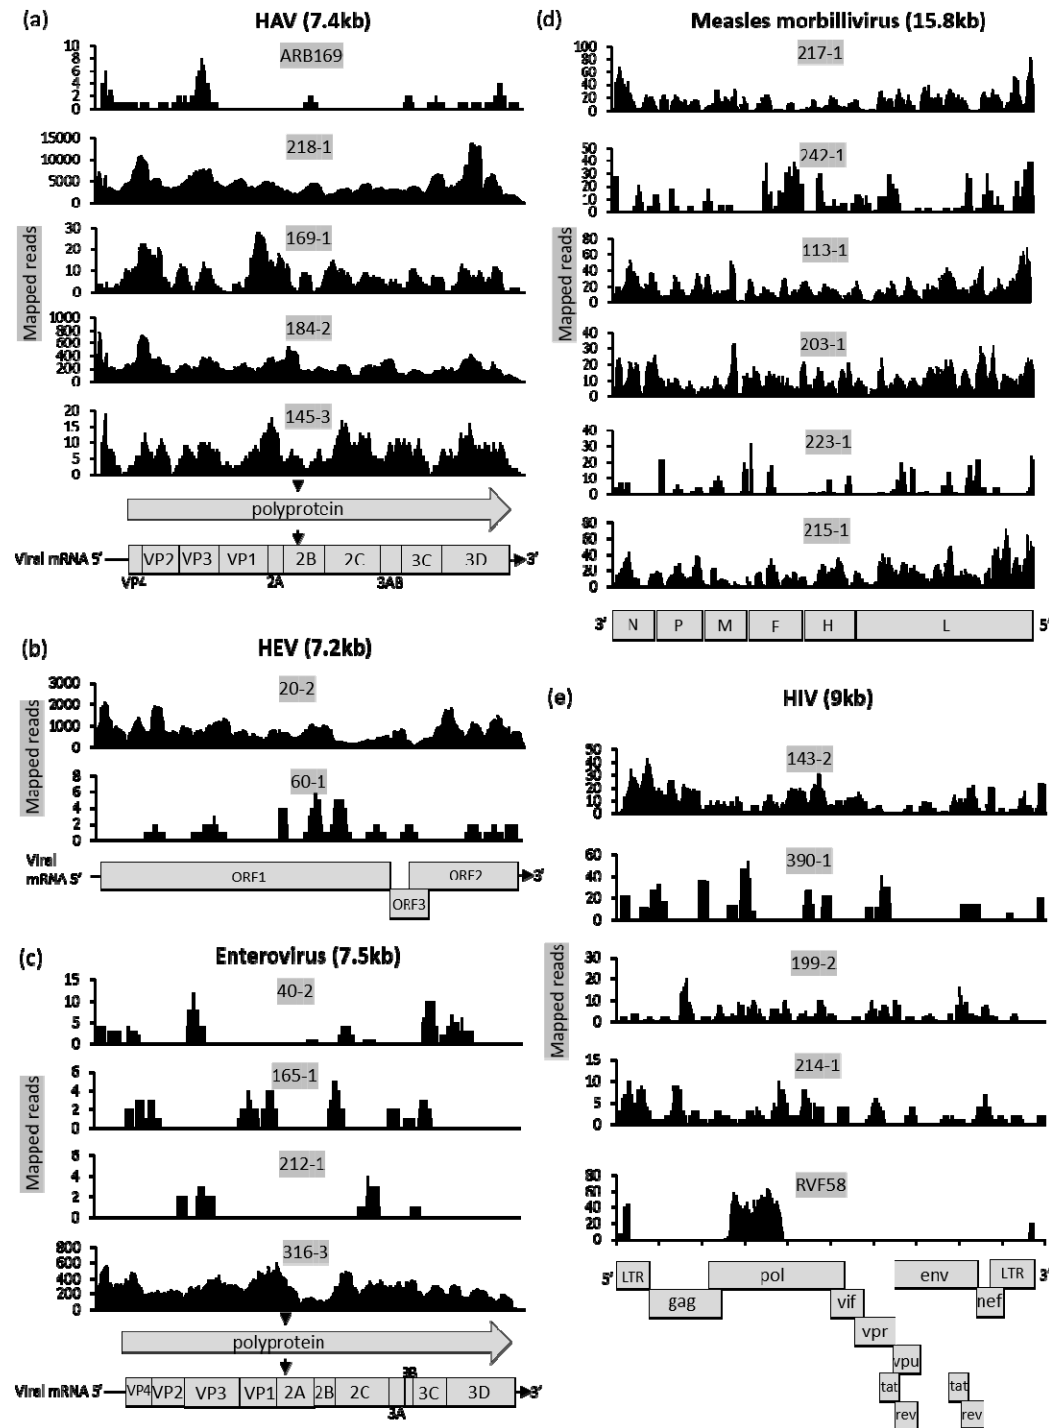

58

59

60

1 **Emerging viruses are an underestimated cause of undiagnosed febrile illness in Uganda**

2

3 Authors

4 Shirin Ashraf\*<sup>1</sup>, Hanna Jerome\*<sup>1</sup>, Daniel Lule Bugembe<sup>3</sup>, Deogratius Ssemwanga<sup>2,3</sup>, Timothy  
5 Byaruhanga<sup>2</sup>, John Timothy Kayiwa<sup>2</sup>, Robert Downing<sup>2</sup>, Jesus F. Salazar-Gonzalez<sup>3</sup>, Maria G.  
6 Salazar<sup>3</sup>, James G. Shepherd<sup>1</sup>, Chris Davis<sup>1</sup>, Nicola Logan<sup>1</sup>, Vattipally B. Sreenu<sup>1</sup>, Gavin S. Wilkie<sup>1</sup>,  
7 Ana da Silva Filipe<sup>1</sup>, Alfred Ssekagiri<sup>1,2</sup>, Prossy Namuwulya<sup>2</sup>, Henry Bukenya<sup>2</sup>, Brian Kigozi<sup>2</sup>,  
8 Weronika Witkowska McConnell<sup>1</sup>, Brian J. Willett<sup>1</sup>, Stephen Balinandi<sup>2</sup>, Julius Lutwama<sup>2</sup>,  
9 Pontiano Kaleebu<sup>2,3</sup>, Josephine Bwogi<sup>2</sup>, Emma C. Thomson<sup>1,4</sup>

10

11 \*Contributed equally

12  Contributed equally

13 Institutions

14 1 MRC-University of Glasgow Centre for Virus Research

15 2 Uganda Virus Research Institute

16 3 MRC/UVRI & LSHTM Uganda Research Unit

17 4 LSHTM

18

19

20 **Table 1. Demographics and clinical characteristics of patients diagnosed with viral infections**  
21

|                                       |                     |
|---------------------------------------|---------------------|
| <b>n</b>                              | 30                  |
| <b>Sex = Male/Female (%)</b>          | 20/10 (66.67/33.33) |
| <b>Age (median [IQR])</b>             | 7.50 [3.75, 13.5]   |
| <b>Age bracket in years (%)</b>       |                     |
| 0 - 5                                 | 12 (40)             |
| 6 - 15                                | 12 (40)             |
| 16 - 25                               | 2 (6.67)            |
| 26 - 35                               | 2 (6.67)            |
| 36 - 45                               | 2 (6.67)            |
| <b>Study Clinic (%)</b>               |                     |
| St Paul's HC                          | 9 (30.00)           |
| Ndejje HC                             | 18 (60.00)          |
| Adumi HC                              | 3 (10.00)           |
| <b>Clinical features</b>              |                     |
| BaselineTemperature (mean (SD))       | 38.21 (0.85)        |
| Fever_duration (mean (SD))            | 3.6 (1.55)          |
| Rigors (%)                            | 7 (23.3)            |
| Headache (%)                          | 19 (63.3)           |
| Neck_pain (%)                         | 6 (20)              |
| Jaundice (%)                          | 3 (10)              |
| Nausea (%)                            | 11 (36.7)           |
| Vomiting (%)                          | 12 (40)             |
| Abdominal_pain (%)                    | 13 (43.3)           |
| Diarrhoea (%)                         | 9 (30)              |
| Myalgia (%)                           | 6 (20)              |
| Arthralgia (%)                        | 9 (30)              |
| Back_pain (%)                         | 6 (20)              |
| Haemorrhage_any (%)                   | 3 (10)              |
| Haemoptysis (%)                       | 1 (3.3)             |
| Haemochezia (%)                       | 2 (6.7)             |
| <b>Contact with ectoparasites (%)</b> | 23 (76.67)          |
| Mosquitoes (%)                        | 22 (73.33)          |
| Ticks (%)                             | 3 (10.00)           |
| Fleas (%)                             | 2 (6.67)            |
| Lice (%)                              | 1 (3.33)            |
| Biting flies (%)                      | 3 (10.00)           |
| <b>Health Centre Diagnosis (%)</b>    |                     |
| Gastroenteritis                       | 1 (3.3)             |
| Malaria                               | 3 (10)              |
| Respiratory tract infection           | 9 (30)              |
| Typhoid                               | 17 (56.6)           |
| Unknown                               | 23 (76.7)           |
| <b>Antibacterial therapy (%)</b>      | 12 (40)             |
| <b>Antimalarial therapy (%)</b>       | 5 (16.7)            |
| <b>Anthelmintic therapy (%)</b>       | 1 (3.3)             |

22

23 **Table 2. Viruses detected by mNGS in undiagnosed patients in the AFI study**

24

| Virus                                                                 | No. of patients | Nearest reference accession(s)           | Country of nearest reference           |
|-----------------------------------------------------------------------|-----------------|------------------------------------------|----------------------------------------|
| <b>Viruses associated with haemorrhagic fever</b>                     |                 |                                          |                                        |
| CCHFV                                                                 | 1               | MW464976 (L), MW464977 (M), DQ211650 (S) | Uganda (L and M) and DRC (S)           |
| RVFV                                                                  | 2               | MG953422, MG273456                       | Uganda, Kenya                          |
| YFV                                                                   | 2               | AY968065, JN620362                       | Uganda                                 |
| DENV-3                                                                | 1               | MN964273                                 | China ex Ethiopia                      |
| <b>Viruses associated with acute hepatitis</b>                        |                 |                                          |                                        |
| HAV                                                                   | 5               | MH685714                                 | Uganda                                 |
| HEV                                                                   | 2               | MH918640                                 | Nigeria                                |
| <b>Blood-borne viruses</b>                                            |                 |                                          |                                        |
| HBV                                                                   | 1               | MK512473                                 | Rwanda                                 |
| HIV-1                                                                 | 6               | MW006081, MW006060, AY322184, EU110093   | Uganda, Kenya                          |
| <b>Respiratory viruses</b>                                            |                 |                                          |                                        |
| Measles B3                                                            | 6               | ON642798, ON642800, ON642797, ON642801   | Uganda                                 |
| Respirovirus 3                                                        | 2               | MN145875, MF973181                       | China, USA                             |
| Rhinovirus C                                                          | 1               | JF317017                                 | China                                  |
| <b>Viruses associated with gastroenteritis</b>                        |                 |                                          |                                        |
| Rotavirus H-like virus                                                | 1               | KX362515                                 | Vietnam                                |
| Echovirus E3, E4 and E9/25                                            | 3               | MF678296, KM024043, MF554740             | Australia (E25), Greece (E3), USA (E4) |
| Coxsackievirus B3                                                     | 1               | KY262575                                 | China                                  |
| <b>Herpesviruses associated with rash and fever</b>                   |                 |                                          |                                        |
| HHV6B                                                                 | 3               | KY315537, MF511176, MF994829             | USA, Uganda, DRC                       |
| <b>Rarely described viruses associated with acute febrile illness</b> |                 |                                          |                                        |
| LDV                                                                   | 1               | NC_034443                                | Senegal                                |

25
